# Supplementary material for: Convergent evidence from systematic analysis of GWAS revealed genetic basis of esophageal cancer
Source: PubMed Central journal article supplement (PMC5190123; doi:10.18632/oncotarget.10133), 2016-06-17
Supplement: oncotarget-07-44621-s001.pdf [file oncotarget-07-44621-s001.pdf]

# Convergent evidence from systematic analysis of GWAS revealed genetic basis of esophageal cancer

## SUPPLEMENTARY FIGURE AND TABLES

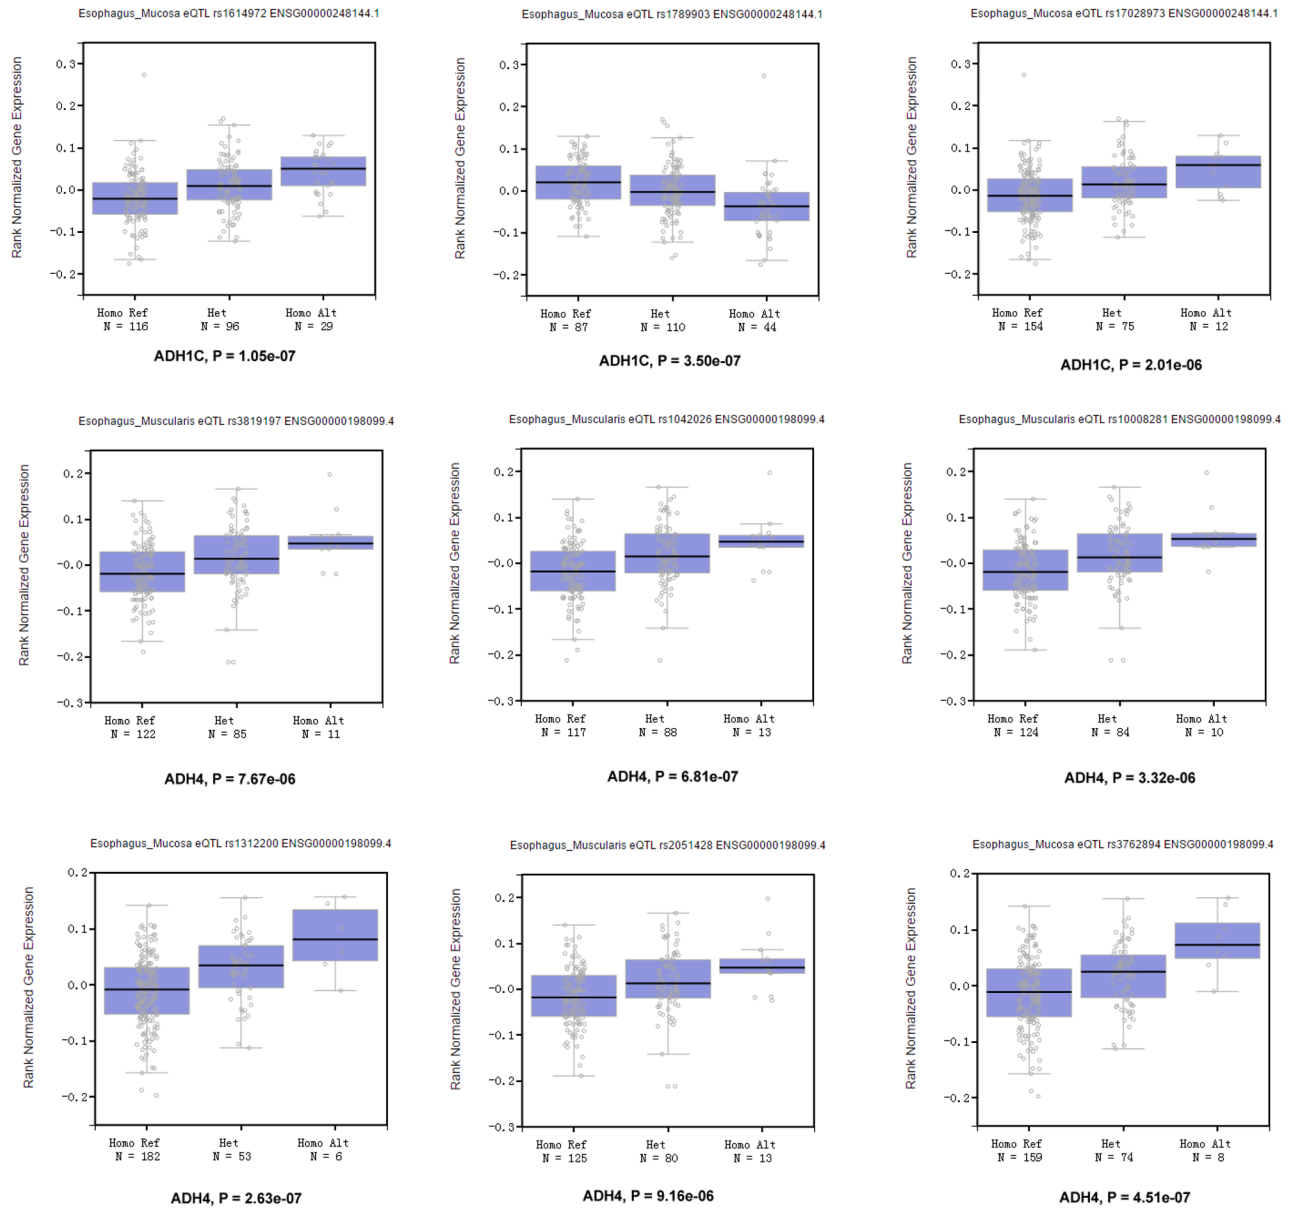

**Supplementary Figure S1: Box plots of risk SNPs in gene *ADH4* and *ADH1C* by eQTL analysis.** Homo Ref: Homologous referenced genotype; Het: heterologous genotype; Homo Alt: Homologous alternative genotype.

**Supplementary Table S1: SNPs with GWAS P-value <5.0E-05.**

**See Supplementary File 1**

**Supplementary Table S2: Annotated information of risk SNPs of esophageal cancer.**

**See Supplementary File 2**

**Supplementary Table S3: Risk SNPs with significant gene expression changes on esophageal tissues.**

**See Supplementary File 3**

**Supplementary Table S4: Details of pathway grouped network.**

**See Supplementary File 4**

Supplementary Table S5: Power analysis of GWAS of esophageal cancer

| Study         | Initial sample size | Replicated Sample size | Power of initial analysis     |     |     | Power of joint analysis (initial sample + replicated sample) |     |     |
|---------------|---------------------|------------------------|-------------------------------|-----|-----|--------------------------------------------------------------|-----|-----|
|               |                     |                        | Assumed risk allele frequency |     |     |                                                              |     |     |
|               |                     |                        | 0.1                           | 0.5 | 0.9 | 0.1                                                          | 0.5 | 0.9 |
| Levine DM[21] | 4725                | 7785                   | 99%                           | 99% | 99% | 99%                                                          | 99% | 99% |
| Jin G[22]     | 6037                | 14442                  | 99%                           | 99% | 99% | 99%                                                          | 99% | 99% |
| Wu C[23]      | 4075                | 16712                  | 99%                           | 99% | 99% | 99%                                                          | 99% | 99% |
| Wu C[24]      | 4075                | 8143                   | 99%                           | 99% | 99% | 99%                                                          | 99% | 99% |
| Abnet CC[25]  | 3998                | NA                     | 96%                           | 99% | 93% | /                                                            | /   | /   |
| Wang LD[26]   | 2810                | 19526                  | 92%                           | 99% | 87% | 99%                                                          | 99% | 99% |
| Cui R[27]     | 1109                | 2680                   | 69%                           | 97% | 61% | 99%                                                          | 99% | 99% |
